# Supplementary material
Source: PubMed Central journal article supplement (PMC4834851)
Supplement: NIHMS412643-supplement-Sup1.pdf [file NIHMS412643-supplement-Sup1.pdf]

## Common and Differential Pathophysiological Features Accompany Comparable Cognitive Impairments in Medication-Free Patients with Schizophrenia and in Healthy Aging Subjects

### Supplemental Information

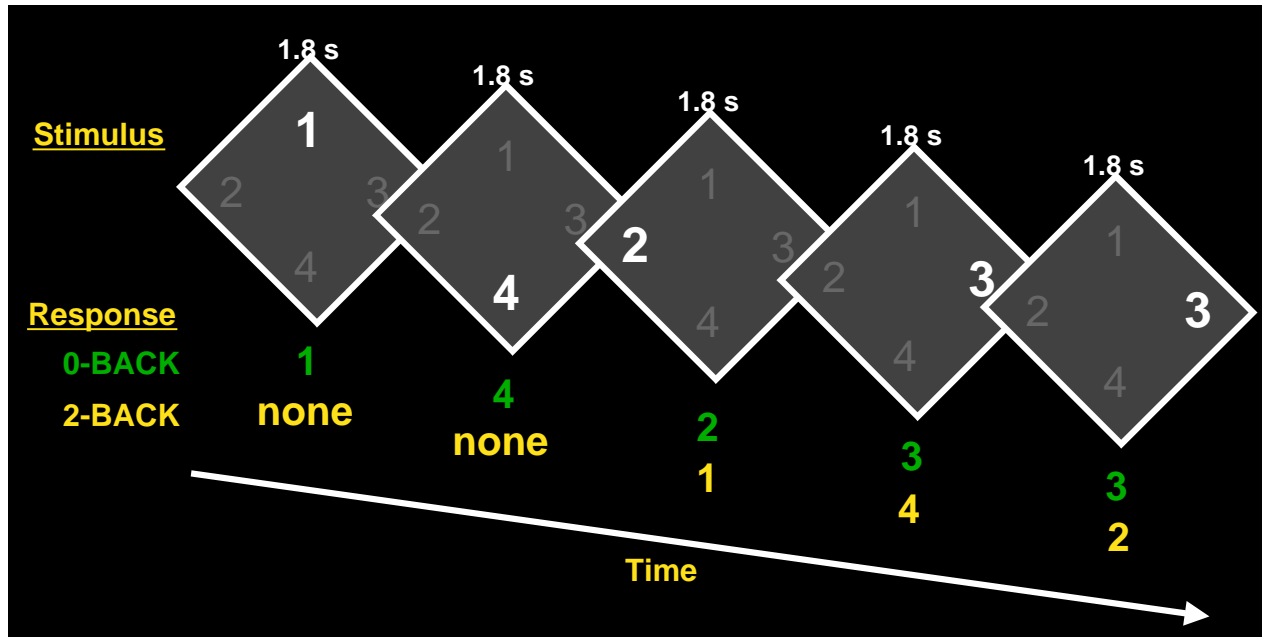

**Figure S1.** The  $n$ -back working memory task. Numbers are highlighted at random, one at a time. The subject maps his or her response onto a diamond-shaped button box. For the 2-back response, the subject responds by pressing the button that corresponds to the stimulus presented two before the current stimulus. The white number represents the current stimulus.

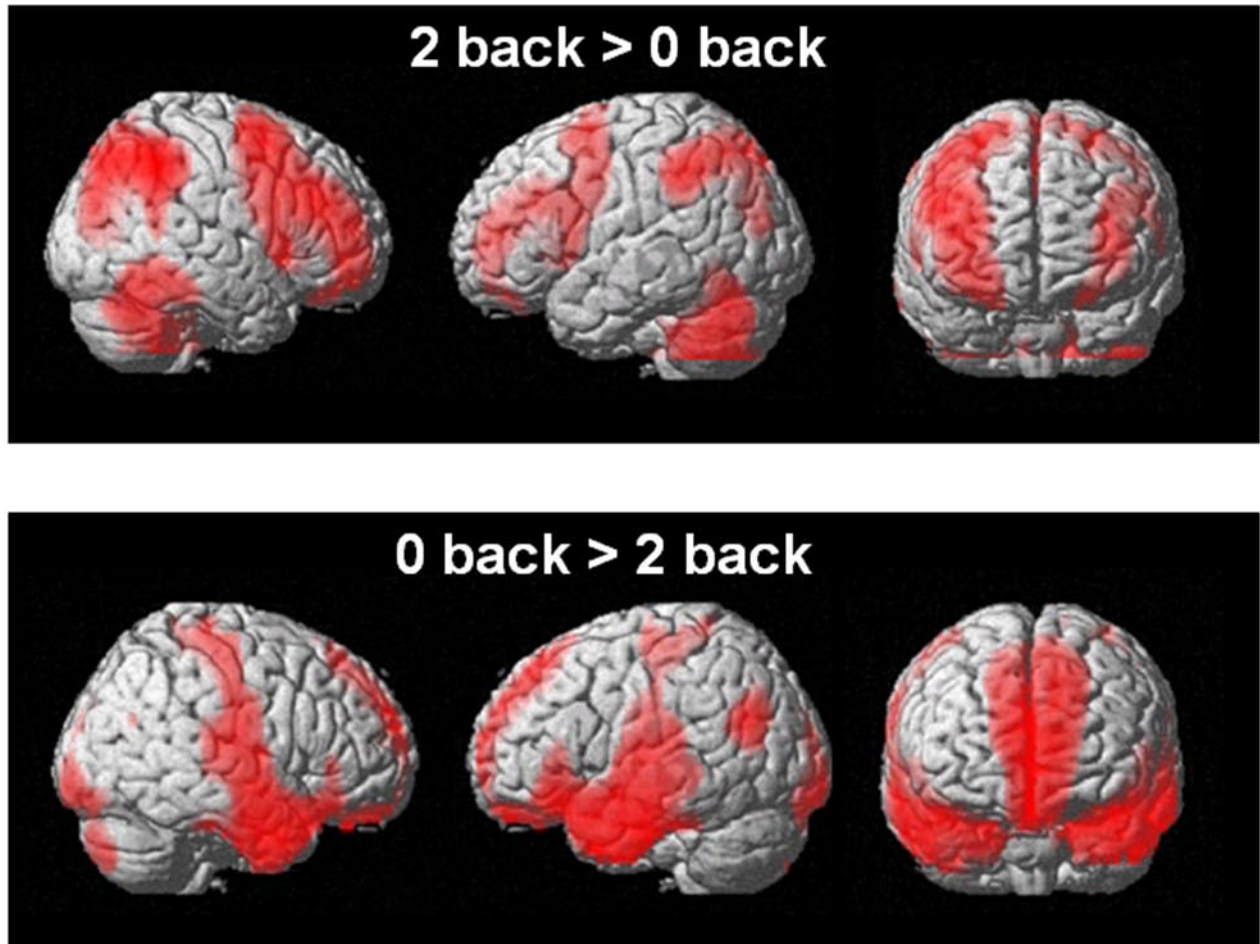

**Figure S2.** Statistical maps showing the brain regions significantly activated ( $p < .001$ ) in the 2-back task compared with the 0-back task in control subjects.

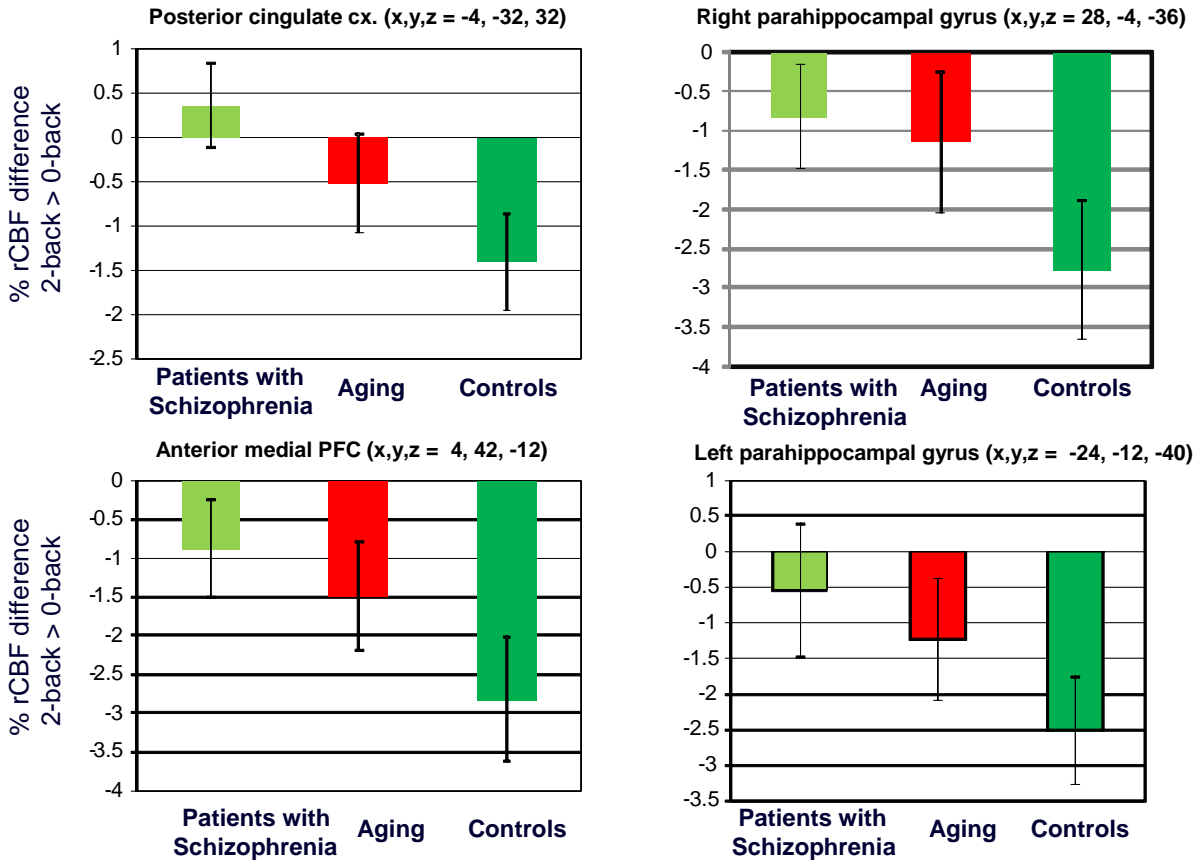

**Figure S3.** Graphs showing common decreased deactivation of regions from the default mode network in patients with schizophrenia and healthy aging subjects in the comparison 2-back > 0-back. cx., cortex; PFC, prefrontal cortex; rCBF, regional cerebral blood flow.
